# Supplementary material for: Effect of Pemafibrate on Hemorheology in Patients with Hypertriglyceridemia and Aggravated Blood Fluidity Associated with Type 2 Diabetes or Metabolic Syndrome
Source: MDPI journal article supplement (doi:10.3390/jcm12041481), 2023-02-13
Supplement: s1 [file s1]

**Supplementary Materials:**

Supplementary Table S1. Characteristic of hemorheological parameters in participants at week 8.

|                                  | Overall (n=96) | Non Pemafibrate (n=46) | Pemafibrate (n=50) | <i>P</i> Value |
|----------------------------------|----------------|------------------------|--------------------|----------------|
| Leukocyte (x10 <sup>3</sup> /μL) | 7.07±1.96      | 7.49±1.87              | 6.70±2.00          | 0.06           |
| RBC (x10 <sup>2</sup> /μL)       | 4.82±0.49      | 4.77±0.46              | 4.87±0.52          | 0.38           |
| Hematocrit (%)                   | 43.8±3.6       | 43.7±3.9               | 44.0±3.4           | 0.74           |
| Platelet (x10 <sup>4</sup> /μL)  | 235.9±69.4     | 224.0±66.9             | 246.6±71.3         | 0.12           |
| Glucose (mg/dL)                  | 132.3±40.7     | 130.0±35.1             | 134.3±45.8         | 0.62           |
| HbA1c (%)                        | 7.2±1.1        | 7.2±1.1                | 7.2±1.3            | 0.99           |
| CPK (mg/dL)                      | 108.8±56.1     | 114.9±61.7             | 103.4±51.4         | 0.34           |
| AST (mg/dL)                      | 28.5±13.7      | 26.9±12.4              | 30.0±14.9          | 0.28           |
| ALT (mg/dL)                      | 24.0±15.5      | 28.0±17.8              | 20.6±12.5          | <0.05          |
| γGTP (mg/dL)                     | 43.6±50.7      | 48.8±43.3              | 39.0±57.0          | 0.37           |

Data are presented as the mean±SD for continuous parameters and % (n) for categorical parameters. Abbreviations: DPP-4, dipeptidyl peptidase-4; CPK, creatin phosphokinase; AST, aspartate aminotransferase; ALT, alanine aminotransferase; GTP, γ-glutamyl transpeptidase

Supplementary Table S2. Characteristic of hemorheological parameters in participants at week 16.

|                                  | Overall (n=96) | Non Pemafibrate (n=46) | Pemafibrate (n=50) | <i>P</i> Value |
|----------------------------------|----------------|------------------------|--------------------|----------------|
| Leukocyte (x10 <sup>3</sup> /μL) | 7.00±1.98      | 7.36±1.81              | 6.66±2.12          | 0.09           |
| RBC (x10 <sup>2</sup> /μL)       | 4.83±0.52      | 4.76±0.50              | 4.89±0.55          | 0.25           |
| Hematocrit (%)                   | 44.0±3.8       | 43.7±3.9               | 44.2±3.7           | 0.5            |
| Platelet (x10 <sup>4</sup> /μL)  | 233.8±70.2     | 218.4±62.6             | 248.5±75.2         | <0.05          |
| Glucose (mg/dL)                  | 128.6±33.4     | 135.8±32.8             | 121.7±33.2         | <0.05          |
| HbA1c (%)                        | 7.2±1.1        | 7.3±1.1                | 7.0±1.2            | 0.35           |
| CPK (mg/dL)                      | 117.2±65.3     | 124.0±70.8             | 110.7±60.4         | 0.34           |
| AST (mg/dL)                      | 28.5±13.4      | 26.5±10.7              | 30.3±15.6          | 0.18           |
| ALT (mg/dL)                      | 25.0±16.7      | 28.1±16.0              | 22.0±17.1          | 0.08           |
| γGTP (mg/dL)                     | 46.5±76.0      | 45.5±36.9              | 47.4±101.2         | 0.9            |

Data are presented as the mean±SD for continuous parameters and % (n) for categorical parameters. Abbreviations: DPP-4, dipeptidyl peptidase-4; CPK, creatin phosphokinase; AST, aspartate aminotransferase; ALT, alanine aminotransferase; GTP, γ-glutamyl transpeptidase

Supplementary Table S3. Characteristic of hemorheological parameters in participants at week 8.

|                                              | Overall (n=96) | Non Pemafibrate (N=46) | Pemafibrate (n=50) | <i>P</i> Value |
|----------------------------------------------|----------------|------------------------|--------------------|----------------|
| Total cholesterol (mg/dL)                    | 173.3±29.8     | 171.5±29.2             | 175.0±30.8         | 0.58           |
| Low-Density Lipoprotein cholesterol (mg/dL)  | 90.5±27.8      | 85.6±26.1              | 94.9±29.2          | 0.12           |
| Triglyceride (mg/dL)                         | 182.6±121.5    | 205.9±139.6            | 161.8±101.1        | 0.09           |
| High-Density Lipoprotein cholesterol (mg/dL) | 46.4±10.6      | 44.9±11.3              | 47.7±10.1          | 0.21           |
| RLP (mg/dL)                                  | 7.6±7.2        | 8.8±9.5                | 5.5±3.1            | <0.01          |
| hsCRP (mg/dL)                                | 0.31±0.96      | 0.22±0.26              | 0.39±1.31          | 0.43           |
| BAP (μmol/L)                                 | 2292.2±433.8   | 2264±397.1             | 2318.1±471.9       | 0.56           |
| d-ROMs (U.CARR)                              | 334.7±70.4     | 367.3±57.3             | 304.8±69.8         | <0.01          |
| FFA (mEq/L)                                  | 0.69±0.31      | 0.75±0.30              | 0.63±0.31          | 0.06           |
| Whole blood transit time (s)                 | 71.5±43.6      | 66.3±37.8              | 76.1±48.7          | 0.29           |
| Number of adhesive leukocytes (/HPF)         | 12.5±7.6       | 12.14±7.07             | 12.8±8.25          | 0.68           |

Data are presented as the mean±SD for continuous parameters and % (n) for categorical parameters. Abbreviations: RLP-C, remnant like particles cholesterol; hsCRP, high sensitivity C-reactive protein; BAP, biological antioxidant potential; d-ROMs, diacron reactive oxygen metabolites; FFA, free fatty acid

Supplementary Table S4. Characteristic of hemorheological parameters in participants at week 16.

|                                                 | Overall<br>(n=96) | Non Pemafibrate<br>(N=46) | Pemafibrate<br>(n=50) | <i>P</i> Value |
|-------------------------------------------------|-------------------|---------------------------|-----------------------|----------------|
| Total cholesterol (mg/dL)                       | 171.5±29.4        | 171.5±31.0                | 171.5±28.5            | 0.99           |
| Low-Density Lipoprotein<br>cholesterol (mg/dL)  | 89.1±27.5         | 81.9±27.3                 | 95.9±26.6             | <0.05          |
| Triglyceride (mg/dL)                            | 177.1±116.5       | 220.5±148.6               | 135.5±49.1            | <0.01          |
| High-Density Lipoprotein<br>cholesterol (mg/dL) | 46.5±11.2         | 44.6±11.5                 | 48.4±10.9             | 0.12           |
| RLP (mg/dL)                                     | 7.3±7.3           | 9.9±9.6                   | 4.9±2.5               | <0.01          |
| hsCRP (mg/dL)                                   | 0.235±0.463       | 0.207±0.277               | 0.262±0.595           | 0.58           |
| BAP (μmol/L)                                    | 2377±410.3        | 2338.6±459.2              | 2412.4±367.6          | 0.40           |
| d-ROMs (U.CARR)                                 | 338.7±63.6        | 362.6±50.8                | 317.3±67.4            | <0.01          |
| FFA (mEq/L)                                     | 0.69±0.26         | 0.72±0.31                 | 0.65±0.21             | 0.19           |
| Whole blood transit time<br>(s)                 | 63.4±34.8         | 68.0±42.0                 | 59.2±27.0             | 0.22           |
| Number of adhesive<br>leukocytes (/HPF)         | 12.05±7.50        | 12.04±7.31                | 12.06±7.81            | 0.99           |

Data are presented as the mean±SD for continuous parameters and % (n) for categorical parameters. Abbreviations: RLP-C, remnant like particles cholesterol; hsCRP, high sensitivity C-reactive protein; BAP, biological antioxidant potential; d-ROMs, diacron reactive oxygen metabolites; FFA, free fatty acid
